# Supplementary material
Source: PubMed Central journal article supplement (PMC3490218)
Supplement: NIHMS393704-supplement-Supplementary.pdf [file NIHMS393704-supplement-Supplementary.pdf]

## Online Supplementary Materials

### Regional Analysis Masks Substantial Local Geographic Variation

Yuting Zhang, Seo Hyon Baik, A. Mark Fendrick, Katherine Baicker

#### Table of Contents

|                                                                                                                                                                                                                              |   |
|------------------------------------------------------------------------------------------------------------------------------------------------------------------------------------------------------------------------------|---|
| Figure S 1. Quintile Analysis for Adjusted Pharmacy Spending and Non-drug Medical Spending Between Hospital-referral Regions and Hospital-service Areas, <i>Without Adjusting for Risk Scores</i> .....                      | 2 |
| Table S 1. Sensitivity Analysis for Variation in Adjusted Outcomes as in Table 1 in Different Hospital-Service Areas.....                                                                                                    | 4 |
| Table S 2. Quintile Analysis for Adjusted Pharmacy Spending and Non-drug Medical Spending Between Hospital-referral Regions and Hospital-service Areas.....                                                                  | 6 |
| Table S 3. Sensitivity Analysis With Exclusion of Risk Scores in the Model: Quintile Analysis for Adjusted Pharmacy Spending and Non-drug Medical Spending Between Hospital-referral Regions and Hospital-service Areas..... | 8 |

**Figure S 1. Quintile Analysis for Adjusted Pharmacy Spending and Non-drug Medical Spending Between Hospital-referral Regions and Hospital-service Areas, *Without Adjusting for Risk Scores***

Panel A. The Type of HSAs Located within High and Low-Spending HRRs

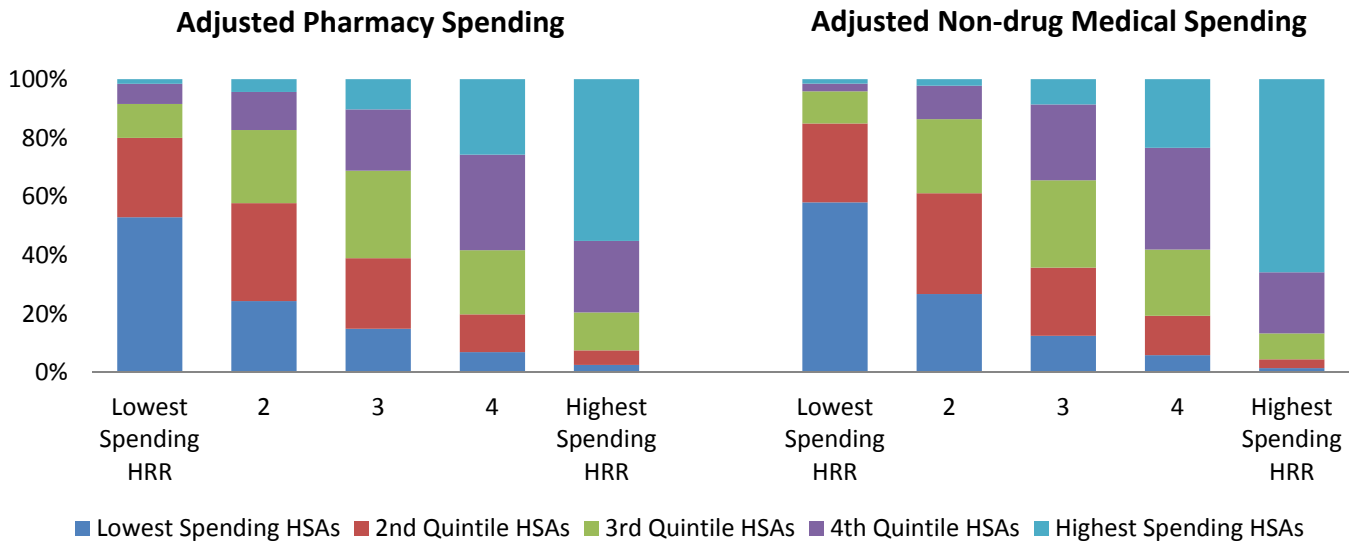

For each quintile of HRR based on HRR spending, this chart shows what shares of the HSAs located within that type of HRR are high or low spending HSAs. For example, 55.2% of the HSAs in the highest drug-spending HRR quintile are in the highest drug-spending quintile of HSAs; 52.9% of the HSAs in the lowest drug-spending HRR quintile are in the lowest HSA quintile.

Panel B. The Type of HRRs where High and Low Spending HSAs are Located

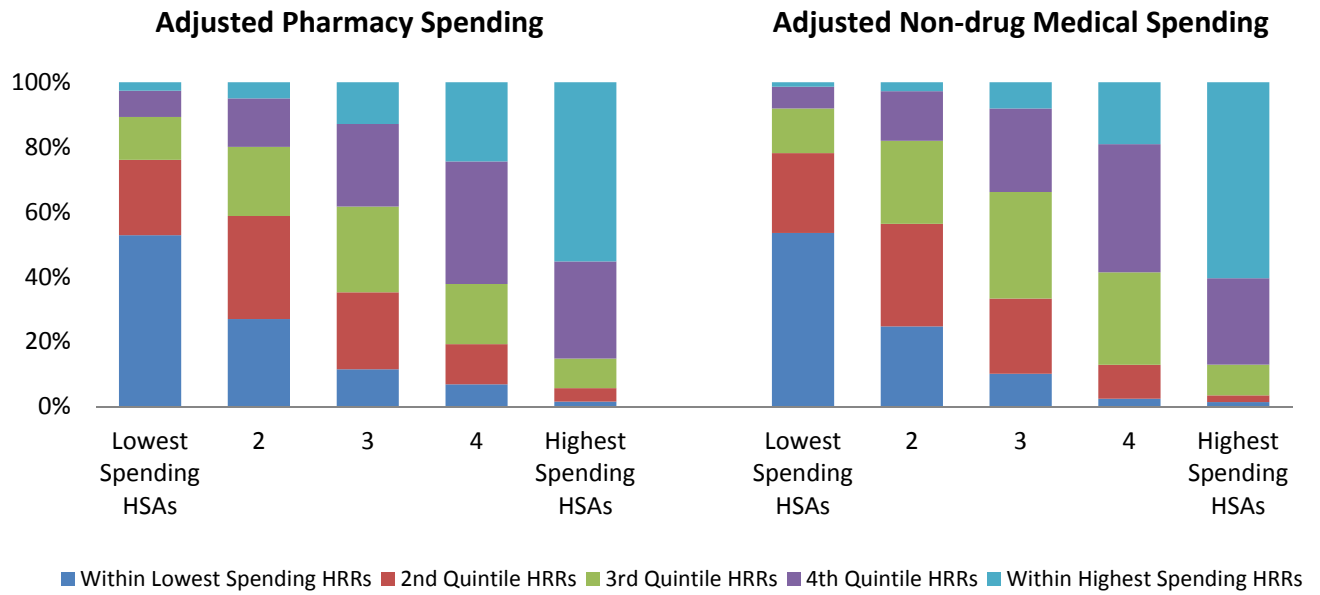

For each quintile of HSA based on HSA spending, this chart shows what share of that type of HSA are located in high and low spending HRRs. For example, for adjusted pharmacy spending, 55.2% of the highest spending quintile HSAs are in the highest-spending quintile HRR; 52.8% of the lowest drug-spending HSAs are in the lowest drug-spending HRR quintile.

**Table S 1. Sensitivity Analysis for Variation in Adjusted Outcomes as in Table 1 in Different Hospital-Service Areas**

Panel A. For those with full enrollment for the year or until death

|                  | Min  | 10th  | 25th  | Median | 75th  | 90th  | Max   | Mean  | S.D. | 75th/<br>25th | COV  |
|------------------|------|-------|-------|--------|-------|-------|-------|-------|------|---------------|------|
| Drug spending    | 1885 | 2315  | 2575  | 2788   | 3032  | 3250  | 4502  | 2799  | 373  | 1.18          | 0.13 |
| Drug counts      | 41   | 47    | 50    | 53     | 56    | 58    | 72    | 53    | 4.53 | 1.11          | 0.09 |
| Medical spending | 7301 | 9257  | 10203 | 10967  | 11796 | 12891 | 16322 | 11060 | 1445 | 1.16          | 0.13 |
| IP counts        | 0.20 | 0.33  | 0.36  | 0.40   | 0.44  | 0.52  | 0.70  | 0.41  | 0.08 | 1.24          | 0.19 |
| OP counts        | 3.20 | 4.89  | 5.55  | 6.21   | 6.76  | 7.19  | 7.93  | 6.09  | 0.92 | 1.22          | 0.15 |
| ER Counts        | 0.36 | 0.56  | 0.63  | 0.72   | 0.82  | 0.92  | 2.02  | 0.74  | 0.18 | 1.30          | 0.24 |
| Total Spending   | 9520 | 11939 | 12966 | 13712  | 14755 | 15763 | 19013 | 13859 | 1497 | 1.14          | 0.11 |

Panel B. For those Aged  $\geq 65$

|                  | Min  | 10th  | 25th  | Median | 75th  | 90th  | Max   | Mean  | S.D. | 75th/<br>25th | COV  |
|------------------|------|-------|-------|--------|-------|-------|-------|-------|------|---------------|------|
| Drug spending    | 1595 | 1944  | 2152  | 2382   | 2637  | 2832  | 4032  | 2398  | 362  | 1.23          | 0.15 |
| Drug counts      | 40   | 47    | 49    | 52     | 55    | 58    | 77    | 53    | 4.81 | 1.12          | 0.09 |
| Medical spending | 6607 | 9045  | 9821  | 10670  | 11699 | 12873 | 16876 | 10837 | 1554 | 1.19          | 0.14 |
| IP counts        | 0.09 | 0.32  | 0.34  | 0.39   | 0.43  | 0.51  | 0.81  | 0.40  | 0.09 | 1.26          | 0.22 |
| OP counts        | 3.01 | 4.58  | 5.30  | 5.95   | 6.60  | 7.07  | 7.87  | 5.89  | 0.95 | 1.25          | 0.16 |
| ER Counts        | 0.16 | 0.46  | 0.51  | 0.59   | 0.68  | 0.78  | 1.33  | 0.61  | 0.14 | 1.32          | 0.23 |
| Total Spending   | 8430 | 11365 | 12139 | 13049  | 14141 | 15230 | 20884 | 13236 | 1602 | 1.16          | 0.12 |

Panel C. Sensitivity analysis with exclusion of risk scores in the model

|                  | Min   | 10th  | 25th  | Median | 75th  | 90th  | Max   | Mean  | S.D. | 75th/<br>25th | COV  |
|------------------|-------|-------|-------|--------|-------|-------|-------|-------|------|---------------|------|
| Drug spending    | 1764  | 2191  | 2465  | 2720   | 3021  | 3238  | 4470  | 2736  | 409  | 1.23          | 0.15 |
| Drug counts      | 40.78 | 46.06 | 49.77 | 52.33  | 55.12 | 57.96 | 71.25 | 52.33 | 4.73 | 1.11          | 0.09 |
| Medical spending | 5934  | 8235  | 9048  | 10144  | 11093 | 12139 | 15337 | 10143 | 1542 | 1.23          | 0.15 |
| IP counts        | 0.09  | 0.28  | 0.32  | 0.37   | 0.42  | 0.49  | 0.69  | 0.38  | 0.08 | 1.31          | 0.22 |
| OP counts        | 2.53  | 4.28  | 5.13  | 5.77   | 6.43  | 7.02  | 7.94  | 5.67  | 1.06 | 1.25          | 0.19 |
| ER Counts        | 0.40  | 0.50  | 0.58  | 0.68   | 0.79  | 0.88  | 1.86  | 0.70  | 0.19 | 1.37          | 0.27 |
| Total Spending   | 8057  | 10736 | 11680 | 12885  | 14016 | 15057 | 17949 | 12879 | 1704 | 1.2           | 0.13 |

Total drug spending includes Part D plan payment before rebates, beneficiary out-of-pocket spending, and subsidy amount. Drug counts are number of monthly prescription drugs (=1 if days supply  $\leq 30$ ; =days supply/30 if days supply  $> 30$ ). Total medical spending included Medicare and beneficiary payment for all medical services (including inpatient, outpatient, physician, home health, hospice, skilled nursing home, and medical devices) and was adjusted for local price-level differences using county-level factor prices given to us by the Medicare Payment Advisory Commission. We did not adjust drug spending for regional price differences because the variation in drug prices among regions was negligible. To account for the difference in population mix across regions, we adjusted for three major categories of beneficiary-level variables: patient demographics, insurance status, and clinical characteristics in the individual-level regressions for each outcome. All outcomes in the table are after adjustment.

Abbreviations: IP = inpatient, OP = outpatient, ER = emergency room, COV = coefficient of variation.

**Table S 2. Quintile Analysis for Adjusted Pharmacy Spending and Non-drug Medical Spending Between Hospital-referral Regions and Hospital-service Areas**

Panel A. Adjusted Pharmacy Spending

| HSA Frequency                           |       | Quintiles of Adjusted HSA Drug Spending |                            |                            |                            |                            | Total                       |             |
|-----------------------------------------|-------|-----------------------------------------|----------------------------|----------------------------|----------------------------|----------------------------|-----------------------------|-------------|
|                                         |       | 1                                       | 2                          | 3                          | 4                          | 5                          |                             |             |
| Cell %                                  | Row % | Column %                                |                            |                            |                            |                            |                             |             |
|                                         |       |                                         | [\$1001, \$2580]           | (\$2580, \$2815]           | (\$2815, \$3022]           | (\$3022, \$3260]           | (\$3260, \$5261]            |             |
| Quintiles of Adjusted HRR Drug Spending | 1     | [\$2347, \$2740]                        | 288<br>9.9<br>50.3<br>49.6 | 156<br>5.4<br>27.2<br>26.8 | 72<br>2.5<br>12.6<br>12.4  | 42<br>1.4<br>7.3<br>7.2    | 15<br>0.5<br>2.6<br>2.6     | 573<br>19.7 |
|                                         | 2     | (\$2740, \$2877]                        | 142<br>4.9<br>26.1<br>24.4 | 178<br>6.1<br>32.7<br>30.6 | 132<br>4.5<br>24.2<br>22.7 | 63<br>2.2<br>11.6<br>10.8  | 30<br>1.0<br>5.5<br>5.2     | 545<br>18.7 |
|                                         | 3     | (\$2877, \$3026]                        | 77<br>2.6<br>15.1<br>13.3  | 114<br>3.9<br>22.4<br>19.6 | 149<br>5.1<br>29.3<br>25.6 | 107<br>3.7<br>21.0<br>18.4 | 62<br>2.1<br>12.2<br>10.7   | 509<br>17.5 |
|                                         | 4     | (\$3026, \$3178]                        | 56<br>1.9<br>8.1<br>9.6    | 99<br>3.4<br>14.3<br>17.0  | 161<br>5.5<br>23.3<br>27.7 | 200<br>6.9<br>28.9<br>34.4 | 175<br>6.0<br>25.3<br>30.1  | 691<br>23.8 |
|                                         | 5     | (\$3178, \$4211]                        | 18<br>0.6<br>3.1<br>3.1    | 35<br>1.2<br>5.9<br>6.0    | 68<br>2.3<br>11.5<br>11.7  | 170<br>5.8<br>28.8<br>29.2 | 299<br>10.3<br>50.7<br>51.5 | 590<br>20.3 |
| Total                                   |       |                                         | 581<br>20.0                | 582<br>20.0                | 582<br>20.0                | 582<br>20.0                | 581<br>20.0                 | 2908<br>100 |

Panel B. Adjusted Non-drug Medical Spending

| HSA Frequency                           |       | Quintiles of Adjusted HSA Drug Spending |                            |                            |                            |                            | Total                       |             |
|-----------------------------------------|-------|-----------------------------------------|----------------------------|----------------------------|----------------------------|----------------------------|-----------------------------|-------------|
|                                         |       | 1                                       | 2                          | 3                          | 4                          | 5                          |                             |             |
| Cell %                                  | Row % | Column %                                |                            |                            |                            |                            |                             |             |
|                                         |       |                                         | [\$6487, \$10532]          | (\$10532, \$11425]         | (\$11425, \$12246]         | (\$12246, \$13269]         | (\$13269, \$23888]          |             |
| Quintiles of Adjusted HRR Drug Spending | 1     | [\$8123, \$10864]                       | 267<br>9.2<br>54.0<br>46.0 | 121<br>4.2<br>24.5<br>20.8 | 57<br>2.0<br>11.5<br>9.8   | 35<br>1.2<br>7.1<br>6.0    | 14<br>0.5<br>2.8<br>2.4     | 494<br>17.0 |
|                                         | 2     | (\$10864, \$11482]                      | 163<br>5.6<br>26.8<br>28.1 | 187<br>6.4<br>30.7<br>32.1 | 141<br>4.8<br>23.2<br>24.2 | 82<br>2.8<br>13.5<br>14.1  | 36<br>1.2<br>5.9<br>6.2     | 609<br>20.9 |
|                                         | 3     | (\$11482, \$12130]                      | 90<br>3.1<br>14.0<br>15.5  | 159<br>5.5<br>24.7<br>27.3 | 171<br>5.9<br>26.6<br>29.4 | 141<br>4.8<br>21.9<br>24.2 | 83<br>2.9<br>12.9<br>14.3   | 644<br>22.1 |
|                                         | 4     | (\$12130, \$12836]                      | 45<br>1.5<br>7.1<br>7.7    | 89<br>3.1<br>14.0<br>15.3  | 156<br>5.4<br>24.6<br>26.8 | 199<br>6.8<br>31.3<br>34.2 | 146<br>5.0<br>23.0<br>25.1  | 635<br>21.8 |
|                                         | 5     | (\$12836, \$19478]                      | 16<br>0.6<br>3.0<br>2.8    | 26<br>0.9<br>4.9<br>4.5    | 57<br>2.0<br>10.8<br>9.8   | 125<br>4.3<br>23.8<br>21.5 | 302<br>10.4<br>57.4<br>52.0 | 526<br>18.1 |
| Total                                   |       |                                         | 581<br>20.0                | 582<br>20.0                | 582<br>20.0                | 582<br>20.0                | 581<br>20.0                 | 2908<br>100 |

This table shows a cross-tab of HSA spending quintiles and HRR spending quintiles, with Panel A based on adjusted drug spending and Panel B based on adjusted non-drug medical spending. Each cell represents the number of HSAs falling into that row and column. The columns are defined based on dividing HSAs into spending quintiles. The first column of Panel A, for example, is HSAs with less than \$2580 annual adjusted drug spending. Thus there are by definition 20% of HSAs in each column. The rows are defined based on dividing HRRs into quintiles of HRR spending and then looking at the HSAs within those HRRs. The first row of Panel A, for example, is HSAs located within HRRs where the average adjusted annual drug spending is less than \$2740 (threshold of 1<sup>st</sup> quintile of HRR drug spending). Thus there may be more or fewer than 20% of HSAs represented in each row. The more geographically clustered together HSAs are based on their spending level, the more they should be located in the diagonal cells.

**Table S 3. Sensitivity Analysis With Exclusion of Risk Scores in the Model: Quintile Analysis for Adjusted Pharmacy Spending and Non-drug Medical Spending Between Hospital-referral Regions and Hospital-service Areas**

Panel A. Adjusted Pharmacy Spending

| HSA Frequency                           |       | Quintiles of Adjusted HSA Drug Spending |                             |                            |                            |                            | Total                       |             |
|-----------------------------------------|-------|-----------------------------------------|-----------------------------|----------------------------|----------------------------|----------------------------|-----------------------------|-------------|
|                                         |       | 1                                       | 2                           | 3                          | 4                          | 5                          |                             |             |
| Cell %                                  | Row % | Column %                                |                             |                            |                            |                            |                             |             |
|                                         |       |                                         | [\$806, \$2495]             | (\$2495, \$2763]           | (\$2763, \$3002]           | (\$3002, \$3263]           | (\$3263, \$5563]            |             |
| Quintiles of Adjusted HRR Drug Spending | 1     | [\$2222, \$2687]                        | 307<br>10.6<br>52.9<br>52.8 | 157<br>5.4<br>27.1<br>27.0 | 67<br>2.3<br>11.6<br>11.5  | 40<br>1.4<br>6.9<br>6.9    | 9<br>0.3<br>1.6<br>1.5      | 580<br>19.9 |
|                                         | 2     | (\$2687, \$2844]                        | 135<br>4.6<br>24.4<br>23.2  | 185<br>6.4<br>33.4<br>31.8 | 138<br>4.7<br>24.9<br>23.7 | 72<br>2.5<br>13.0<br>12.4  | 24<br>0.8<br>4.3<br>4.1     | 554<br>19.1 |
|                                         | 3     | (\$2844, \$3008]                        | 77<br>2.6<br>14.9<br>13.3   | 124<br>4.3<br>24.0<br>21.3 | 154<br>5.3<br>29.8<br>26.5 | 108<br>3.7<br>20.9<br>18.6 | 53<br>1.8<br>10.3<br>9.1    | 516<br>17.7 |
|                                         | 4     | (\$3008, \$3187]                        | 47<br>1.6<br>7.0<br>8.1     | 87<br>3.0<br>12.9<br>14.9  | 148<br>5.1<br>21.9<br>25.4 | 220<br>7.6<br>32.5<br>37.8 | 174<br>6.0<br>25.7<br>29.9  | 676<br>23.2 |
|                                         | 5     | (\$3187, \$4548]                        | 15<br>0.5<br>2.6<br>2.6     | 29<br>1.0<br>5.0<br>5.0    | 75<br>2.6<br>12.9<br>12.9  | 142<br>4.9<br>24.4<br>24.4 | 321<br>11.0<br>55.2<br>55.2 | 582<br>20.0 |
|                                         | Total |                                         | 581<br>20.0                 | 582<br>20.0                | 582<br>20.0                | 582<br>20.0                | 581<br>20.0                 | 2908<br>100 |



Panel B. Adjusted Non-drug Medical Spending

| HSA Frequency                           |       | Quintiles of Adjusted HSA Drug Spending |                             |                            |                            |                            | Total                       |             |
|-----------------------------------------|-------|-----------------------------------------|-----------------------------|----------------------------|----------------------------|----------------------------|-----------------------------|-------------|
|                                         |       | 1                                       | 2                           | 3                          | 4                          | 5                          |                             |             |
| Cell %                                  | Row % | Column %                                |                             |                            |                            |                            |                             |             |
|                                         |       |                                         | [\$4569, \$9706]            | (\$9706, \$10860]          | (\$10860, \$11993]         | (\$11993, \$13348]         | (\$13348, \$28276]          | 1           |
| Quintiles of Adjusted HRR Drug Spending | 1     | [\$5993, \$10175]                       | 311<br>10.7<br>58.0<br>53.5 | 144<br>5.0<br>26.9<br>24.7 | 59<br>2.0<br>11.0<br>10.1  | 14<br>0.5<br>2.6<br>2.4    | 8<br>0.3<br>1.5<br>1.4      | 536<br>18.4 |
|                                         | 2     | (\$10175, \$11084]                      | 143<br>4.9<br>26.7<br>24.6  | 184<br>6.3<br>34.4<br>31.6 | 135<br>4.6<br>25.2<br>23.2 | 61<br>2.1<br>11.4<br>10.5  | 12<br>0.4<br>2.2<br>2.1     | 535<br>18.4 |
|                                         | 3     | (\$11084, \$11991]                      | 80<br>2.8<br>12.5<br>13.8   | 149<br>5.1<br>23.2<br>25.6 | 191<br>6.6<br>29.8<br>32.8 | 166<br>5.7<br>25.9<br>28.5 | 55<br>1.9<br>8.6<br>9.5     | 641<br>22.0 |
|                                         | 4     | (\$11991, \$13046]                      | 39<br>1.3<br>5.9<br>6.7     | 89<br>3.1<br>13.4<br>15.3  | 150<br>5.2<br>22.6<br>25.8 | 230<br>7.9<br>34.7<br>39.5 | 155<br>5.3<br>23.4<br>26.7  | 663<br>22.8 |
|                                         | 5     | (\$13046, \$23200]                      | 8<br>0.3<br>1.5<br>1.4      | 16<br>0.6<br>3.0<br>2.7    | 47<br>1.6<br>8.8<br>8.1    | 111<br>3.8<br>20.8<br>19.1 | 351<br>12.1<br>65.9<br>60.4 | 533<br>18.3 |
| Total                                   |       |                                         | 581<br>20.0                 | 582<br>20.0                | 582<br>20.0                | 582<br>20.0                | 581<br>20.0                 | 2908<br>100 |

This table shows a cross-tab of HSA spending quintiles and HRR spending quintiles, with Panel A based on adjusted drug spending and Panel B based on adjusted non-drug medical spending. Each cell represents the number of HSAs falling into that row and column. The columns are defined based on dividing HSAs into spending quintiles. The first column of Panel A, for example, is HSAs with less than \$2495 annual adjusted drug spending. Thus there are by definition 20% of HSAs in each column. The rows are defined based on dividing HRRs into quintiles of HRR spending and then looking at the HSAs within those HRRs. The first row of Panel A, for example, is HSAs located within HRRs where the average adjusted annual drug spending is less than \$2687 (threshold of 1<sup>st</sup> quintile of HRR drug spending). Thus there may be more or fewer than 20% of HSAs represented in each row. The more geographically clustered together HSAs are based on their spending level, the more they should be located in the diagonal cells.
